# Supplementary material
Source: publisher figshare collection journal article supplement (https://diabetesjournals.figshare.com/articles/dataset/_/17378756)
Supplement: Supplementary file 1 [file 32061149]

## SUPPLEMENTARY MATERIAL

**Table S1. Change in total daily insulin dose and type of insulin administration**

| <b>MDI</b>                               | All (n=134)           | Baseline HbA1c <7.0% [53 mmol/mol] (n=7) | Baseline HbA1c 7.0-8.0% [53-64 mmol/mol] (n=55) | Baseline HbA1c >8.0% [64 mmol/mol] (n=72) | Baseline BMI ≤27, kg/m <sup>2</sup> (n=37) | Baseline BMI >27, kg/m <sup>2</sup> (n=97) |
|------------------------------------------|-----------------------|------------------------------------------|-------------------------------------------------|-------------------------------------------|--------------------------------------------|--------------------------------------------|
| Basal TDI at baseline, IU/Kg             | 0.395 ±0.17           | 0.408 ±0.15                              | 0.377 ±0.14                                     | 0.408 ±0.19                               | 0.402 ±0.19                                | 0.393 ±0.16                                |
| Basal TDI at 12 months, IU/Kg            | 0.347 ±0.14 (p=0.000) | 0.399 ±0.15 (p=0.764)                    | 0.320 ±0.12 (p=0.000)                           | 0.363 ±0.16 (p=0.000)                     | 0.354 ±0.17 (p=0.000)                      | 0.344 ±0.13 (p=0.000)                      |
| Basal TDI difference at 12 months (%)    | -0.048 (-12.2%)       | -0.009 (-2.2%)                           | -0.057 (-15.1%)                                 | -0.045 (-11.0%)                           | -0.048 (-11.9%)                            | -0.049 (-12.5%)                            |
| Prandial TDI at baseline, IU/Kg          | 0.325 ±0.17           | 0.287 ±0.17                              | 0.308 ±0.14                                     | 0.341 ±0.19                               | 0.293 ±0.11                                | 0.336 ±0.19                                |
| Prandial TDI at 12 months, IU/Kg         | 0.301 ±0.14 (p=0.004) | 0.276 ±0.15 (p=0.518)                    | 0.279 ±0.12 (p=0.004)                           | 0.318 ±0.16 (p=0.087)                     | 0.285 ±0.11 (p=0.433)                      | 0.305 ±0.15 (p=0.005)                      |
| Prandial TDI difference at 12 months (%) | -0.024 (-7.4%)        | -0.011 (-3.8%)                           | -0.029 (-9.4%)                                  | -0.023 (-6.7%)                            | -0.008 (-2.7%)                             | -0.031 (-9.2%)                             |
| <b>CSII</b>                              | All (n=65)            | Baseline HbA1c <7.0% [53 mmol/mol] (n=3) | Baseline HbA1c 7.0-8.0% [53-64 mmol/mol] (n=24) | Baseline HbA1c >8.0% [64 mmol/mol] (n=38) | Baseline BMI ≤27, kg/m <sup>2</sup> (n=26) | Baseline BMI >27, kg/m <sup>2</sup> (n=39) |
| TDI at baseline, IU/Kg                   | 0.525 ±0.18           | 0.410 ±0.04                              | 0.530 ±0.22                                     | 0.531 ±0.14                               | 0.517 ±0.16                                | 0.532 ±0.20                                |
| TDI at 12 months, IU/Kg                  | 0.487 ±0.14 (p=0.035) | 0.315 ±0.05 (p=0.033)                    | 0.463 ±0.14 (p=0.024)                           | 0.523 ±0.13 (p=0.748)                     | 0.466 ±0.15 (p=0.003)                      | 0.506 ±0.14 (p=0.389)                      |
| TDI difference at 12 months (%)          | -0.038 (-7.2%)        | -0.095 (-23.2%)                          | -0.067 (-12.6%)                                 | -0.008 (-1.5%)                            | -0.051 (-9.9%)                             | -0.026 (-4.9%)                             |

CSII: continuous subcutaneous insulin infusion; MDI: multiple daily injections; TDI: total daily insulin dose.

**Table S2. Changes in eGFR and microalbuminuria status from baseline to 12 months**

|                                             | At baseline<br>(n=142) | At 12 months<br>(n=142) | Progression/Regression<br>n (%) |
|---------------------------------------------|------------------------|-------------------------|---------------------------------|
| eGFR $\geq$ 90<br>ml/min/1.73m <sup>2</sup> | 95 (66.9%)             | 105 (73.9%)             | +10 (+10.5%)                    |
| eGFR < 90<br>ml/min/1.73m <sup>2</sup>      | 47 (33.1%)             | 37 (26.1%)              | -10 (-21.3%)                    |
|                                             | At baseline<br>(n=134) | At 12 months<br>(n=134) | Progression/Regression<br>n (%) |
| UACR <15 mg/g                               | 120 (89.6%)            | 122 (91.0%)             | +2 (+1.7%)                      |
| UACR $\geq$ 15 mg/g                         | 14 (10.4%)             | 12 (9.0%)               | -2 (-14.2%)                     |

eGFR: estimated glomerular filtration rate; UACR: urinary albumin-to-creatinine ratio.

**Table S3. Genital infection and diabetic ketoacidosis according to SGLT2 inhibitor type and dose\***

|                                | Empa-<br>gliflozin<br>5mg<br>(n=50) | Empa-<br>gliflozin<br>10mg<br>(n=47) | Empa-<br>gliflozin<br>12.5mg<br>(n=9) | Empa-<br>gliflozin<br>25mg<br>(n=7) | Dapagli-<br>flozin<br>5mg<br>(n=26) | Dapagli-<br>flozin<br>10mg<br>(n=41) | Cana-<br>gliflozin<br>50mg<br>(n=1) | Cana-<br>gliflozin<br>100mg<br>(n=18) |
|--------------------------------|-------------------------------------|--------------------------------------|---------------------------------------|-------------------------------------|-------------------------------------|--------------------------------------|-------------------------------------|---------------------------------------|
| Genital<br>infection<br>(n=45) | 9 (18%)                             | 11<br>(23.4%)                        | 3<br>(33.3%)                          | 1<br>(14.3%)                        | 10<br>(38.5%)                       | 9<br>(22.0%)                         | 0<br>(0.0%)                         | 2<br>(11.1%)                          |
| DKA (n=7)                      | 2<br>(4.0%)                         | 2<br>(4.3%)                          | 1<br>(11.1%)                          | 1<br>(14.3%)                        | 0 (0.0%)                            | 1 (2.4%)                             | 0<br>(0.0%)                         | 0 (0.0%)                              |

DKA: Diabetic ketoacidosis; \*The SGLT2i (type and dose) registered corresponded to the one the patient was receiving at the time of the adverse event.

**Table S4. Differences on adverse events between Belgium and Spain**

| All (n=199)                                                       | Belgium<br>(n=71) | Spain<br>(n=128) |
|-------------------------------------------------------------------|-------------------|------------------|
| Any adverse event* (n=57)                                         | 25 (35.2%)        | 32 (25.0%)       |
| 2 adverse events* (n=1)                                           | 1 (1.4%)          | 0 (0.0%)         |
| Genital infection (n=45)                                          | 20 (28.2%)        | 25 (19.5%)       |
| Ketosis (n=5)                                                     | 2 (2.8%)          | 3 (2.3%)         |
| Diabetic ketoacidosis (n=7)                                       | 3 (4.2%)          | 4 (3.1%)         |
| Severe hypoglycemia (n=0)                                         | 0 (0.0%)          | 0 (0.0%)         |
| Adverse events leading to<br>discontinuation of treatment (n= 15) | 8 (11.3%)         | 7 (5.5%)         |

**Table S5. Change from baseline in HbA1c, weight, total daily insulin dose and renal function: in-label SGLT2 inhibitors prescription versus off-label**

|                                                         | *IN-LABEL SGLT2i<br>(N=20) | OFF-LABEL SGLT2i<br>(N=179) |
|---------------------------------------------------------|----------------------------|-----------------------------|
| Baseline HbA1c, %<br>[mmol/mol] (mean, SD)              | 8.3 (± 0.9) [67.2]         | 8,2 (± 0.9) [66.1]          |
| 12m HbA1c, % [mmol/mol]<br>(mean, SD)                   | 7.6 (± 0.7) [59.6]         | 7.7 (± 0.7) [60.7]          |
| HbA1c difference                                        | -0.7 (p= 0.004)            | -0.5 (p< 0.001)             |
| Baseline weight, kg (mean,<br>SD)                       | 90.3 (± 10.2)              | 82.8 (± 15.0)               |
| 12m weight, kg (mean, SD)                               | 85.8 (±11.8)               | 80.0 (± 15.2)               |
| Weight difference                                       | -4.5 (p= 0.002)            | -2.7 (p <0.001)             |
| TDI at baseline, IU/kg (mean,<br>SD)                    | 0.627 (±0,26)              | 0.673 (±0.27)               |
| TDI at 12m, IU/kg (mean,<br>SD)                         | 0.599 (±0,27)              | 0.606 (± 0.22)              |
| TDI difference                                          | -0.028 (p= 0.234)          | -0.067 (p< 0.001)           |
| Baseline eGFR, ml/min/1.73<br>m <sup>2</sup> (mean, SD) | 100.1 (± 20.3)             | 96.8 (± 14.5)               |
| 12m eGFR, ml/min/1.73 m <sup>2</sup><br>(mean, SD)      | 98.1 (± 22.5)              | 98.4 (± 15.2)               |
| eGFR difference                                         | -2.0 (p= 0.414)            | +1,5 (p= 0.105)             |
| Baseline UACR, mg/g<br>(mean, SD)                       | 6.8 (± 6.3)                | 10.0 (± 16.7)               |
| 12m UACR, mg/g (mean,<br>SD)                            | 6.0 (± 3.0)                | 12.6 (± 34.3)               |
| UACR difference                                         | -0,8 (p= 0.550)            | +2,6 (p= 0.391)             |

eGFR: estimated glomerular filtration rate; SGLT2i: SGLT2 inhibitor; TDI: total daily insulin dose; UACR: urinary albumin-to-creatinine ratio. \*In-label SGLT2i prescription: dapagliflozin 5mg, BMI> 27kg/m<sup>2</sup>.

**Table S6. Adverse events with SGLT2 inhibitors: in-label SGLT2 inhibitors prescription versus off-label**

|                                                               | IN-LABEL SGLT2i<br>(N=20) | OFF-LABEL SGLT2i<br>(N=179) |
|---------------------------------------------------------------|---------------------------|-----------------------------|
| Any adverse event (n, %)                                      | 6 (30.0)                  | 51 (28.5)                   |
| 2 adverse events (n, %)                                       | 0 (0.0)                   | 1 (0.6)                     |
| Genital infection (n, %)                                      | 6 (30.0)                  | 39 (21.8)                   |
| Ketosis (n, %)                                                | 0 (0.0)                   | 5 (2.8)                     |
| Diabetic ketoacidosis (n, %)                                  | 0 (0.0)                   | 7 (3.9)                     |
| Severe hypoglycemia (n, %)                                    | 0 (0.0)                   | 0 (0.0)                     |
| Severe polyuria (n, %)                                        | 0 (0.0)                   | 1 (0.6)                     |
| Adverse events leading to discontinuation of treatment (n, %) | 2 (10.0)                  | 13 (7.3)                    |

SGLT2i: SGLT2 inhibitor.

**Table S7. Prescribing trends between Belgium and Spain**

|                   | Empa-<br>gliclozin<br>5mg<br>(n=50) | Empa-<br>gliclozin<br>10mg<br>(n=48) | Empa-<br>gliclozin<br>12.5mg<br>(n=8) | Empa-<br>gliclozin<br>25mg<br>(n=7) | Dapa-<br>gliclozin<br>5mg<br>(n=25) | Dapa-<br>gliclozin<br>10mg<br>(n=41) | Cana-<br>gliclozin<br>50mg<br>(n=2) | Cana-<br>gliclozin<br>100mg<br>(n=18) |
|-------------------|-------------------------------------|--------------------------------------|---------------------------------------|-------------------------------------|-------------------------------------|--------------------------------------|-------------------------------------|---------------------------------------|
| Belgium<br>(n=71) | 9                                   | 15                                   | 7                                     | 5                                   | 12                                  | 21                                   | 0                                   | 2                                     |
| Spain<br>(n=128)  | 41                                  | 33                                   | 1                                     | 2                                   | 13                                  | 20                                   | 2                                   | 16                                    |
